# Supplementary material
Source: PubMed Central journal article supplement (PMC4433461)
Supplement: supp_WNL.0000000000001565_Supplemental_figures.pdf [file supp_WNL.0000000000001565_Supplemental_figures.pdf]

**Figure e-1. Lack of correlation between baseline NIS and baseline VEGF**

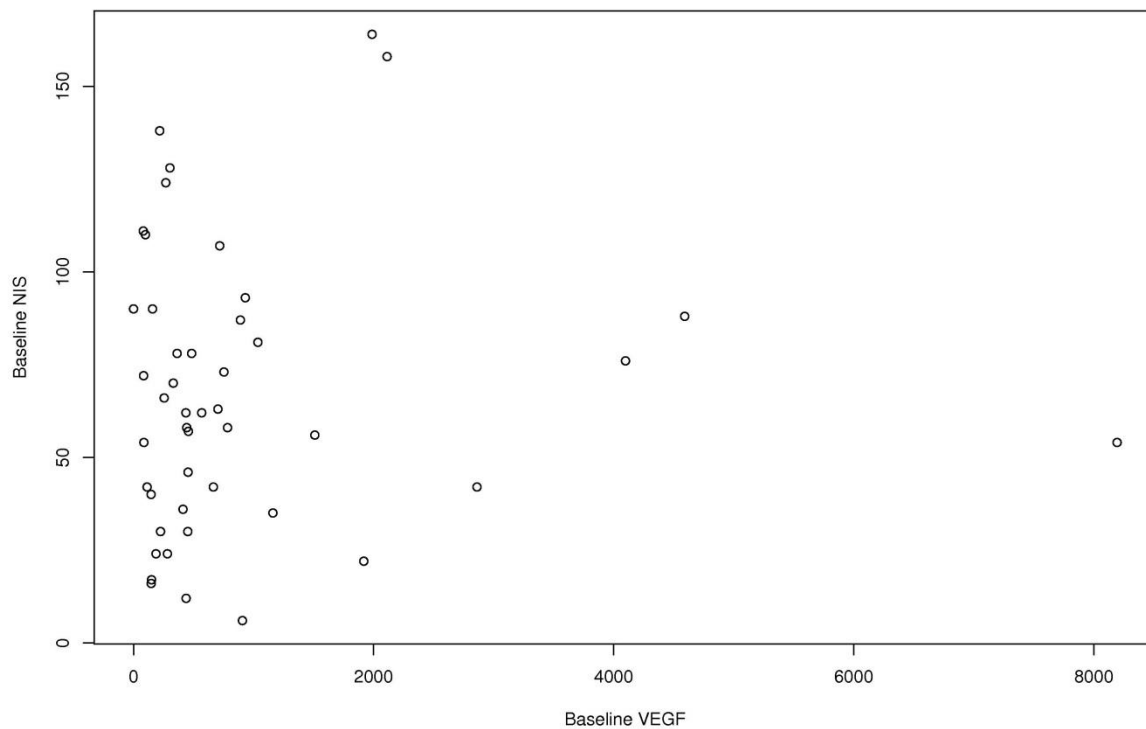

**Figure e-2. VEGF levels decline following autologous stem transplantation**

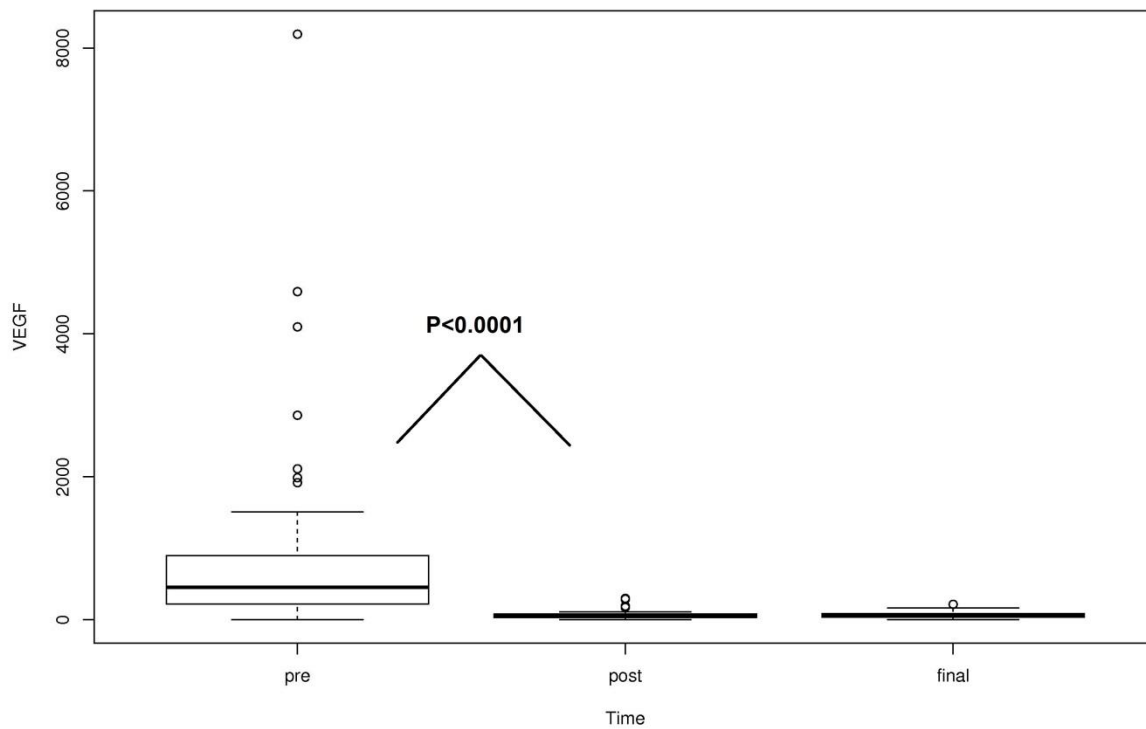

Figure e-2 legend: VEGF levels decreased from a median of 452 pg/mL at t0 to 52 pg/mL at t1 ( $p < 0.0001$ ) and from 52 pg/mL to 63.5 pg/mL at t2 ( $p = 0.45$ ).
